# Supplementary material for: Bayesian Nonparametric Inference of Population Size Changes from Sequential Genealogies
Source: Oxford University Press journal article supplement (doi:10.1534/genetics.115.177980), 2015-07-28
Supplement: genetics.115.177980-5.pdf [file genetics.115.177980-5.pdf]

## Supporting Information

### File S2. Visible transitions between Tajima's genealogies

A Tajima's genealogy  $g^T$  corresponds to the pair of coalescent times and a ranked tree shape with  $n$  tips (i.e. with no labels but ranked coalescent events). In Figure S2, we show four possible visible transitions. In the first case (Figure S2A), when we compare the number of *children* of the blue circle node on the right tree at time  $t$  with the *children* of the red circle node on the left tree, we can conclude that only the green branch could have been selected for pruning. In Figure S2B, comparing the *children* of the blue circle node on the right genealogy to the *children* of the red circle in the left genealogy, we conclude that the two *children* of the red circle are possible pruning locations. In Figures S2C-D,  $t_{new} < t_{del}$ . This implies that the possible pruning locations will necessarily have heights up to  $t_{new}$ . Again, by comparing the *children* of the blue circle node on the right to the *children* of the red circle node on the left, we can assess the possible pruning locations.

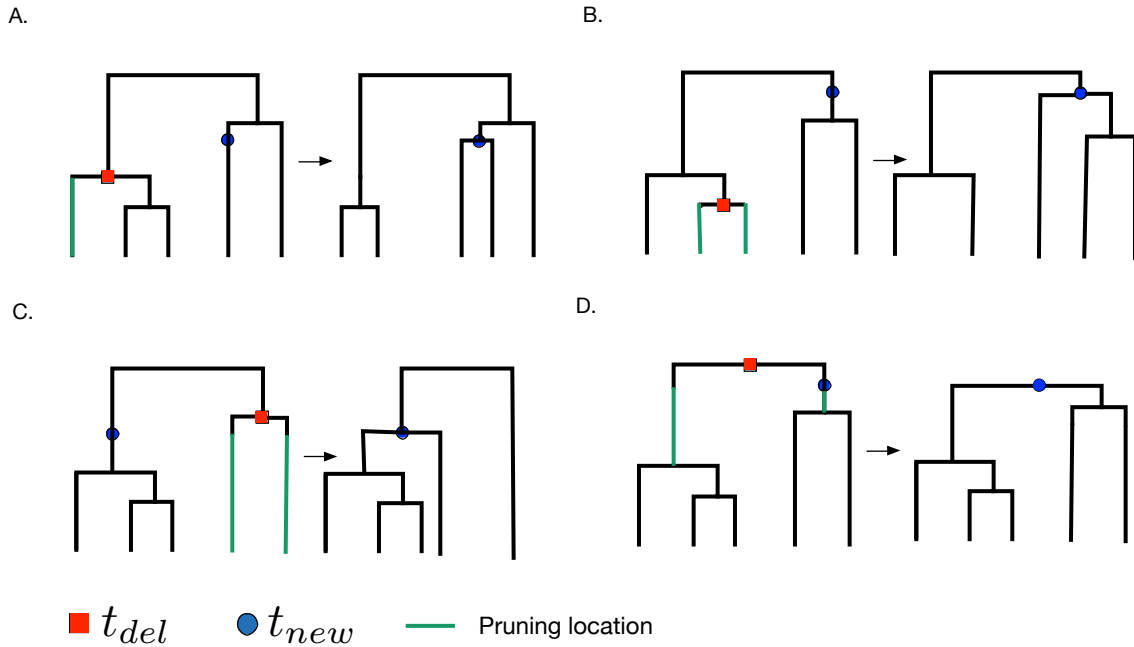

Figure S2: Examples of visible transitions between local Tajima's genealogies. Red circle indicates deleted node at coalescent time  $t_{del}$ , blue circle indicates new node at coalescent time  $t_{new}$ . Green lines indicates possible pruning locations that could have resulted in such a visible transition.
