# Supplementary material for: Bayesian Nonparametric Inference of Population Size Changes from Sequential Genealogies
Source: Oxford University Press journal article supplement (doi:10.1534/genetics.115.177980), 2015-07-28
Supplement: genetics.115.177980-7.pdf [file genetics.115.177980-7.pdf]

## Supporting Information

### File S5. Analysis of Human data

We use *ARGweaver* (Rasmussen et al., 2014) with the following code lines:

#### European population:

```
arg-sample -s data1000/CEU_10.sites
-N 11534 -r 1.6e-8 -m 1.26e-8
--ntimes 200 --maxtime 200e3 -c 1 -n 10
-o data1000/CEU.sample/out
```

#### Yoruban population:

```
arg-sample -s data1000/YRI_10.sites
-N 11534 -r 1.6e-8 -m 1.26e-8
--ntimes 200 --maxtime 200e3 -c 1 -n 10
-o data1000/YRI.sample/out
```

*ARGweaver* time is measured in units of generations, so in order to generate Figure 8, we multiplied time by  $1/(2 \times 11,534)$ . To obtain  $\log N(t)$  displayed in Figure S4, we multiplied our estimates by  $1/(8 \times 11,532)$  and converted them in logarithmic scale.

We note that *ARGweaver* assumes the SMC and not the SMC' model so our estimates of  $N(t)$  are biased. One source of such a bias is that the  $A^i(t)$  functions that indicate the number of lineages present at time  $t$  in the SMC' are replaced by  $A^i(t) - 1$  if the pruning branch is present at time  $t$  in the SMC. Another source of bias is the lack of invisible recombination events in *ARGweaver* realizations. To approximate the effect of this difference we re-run our algorithm replacing  $A^i(t)$  by  $A^i(t) - 1$ . Figure S4 shows that the main conclusions about inferred recent past population sizes remain valid; in our analysis of human data (Figure 8) we only focus on the recent past.

## References

Rasmussen, M. D., Hubisz, M. J., Gronau, I., and Siepel, A. (2014). Genome-wide inference of ancestral recombination graphs. *PLoS Genet*, 10(5):e1004342.

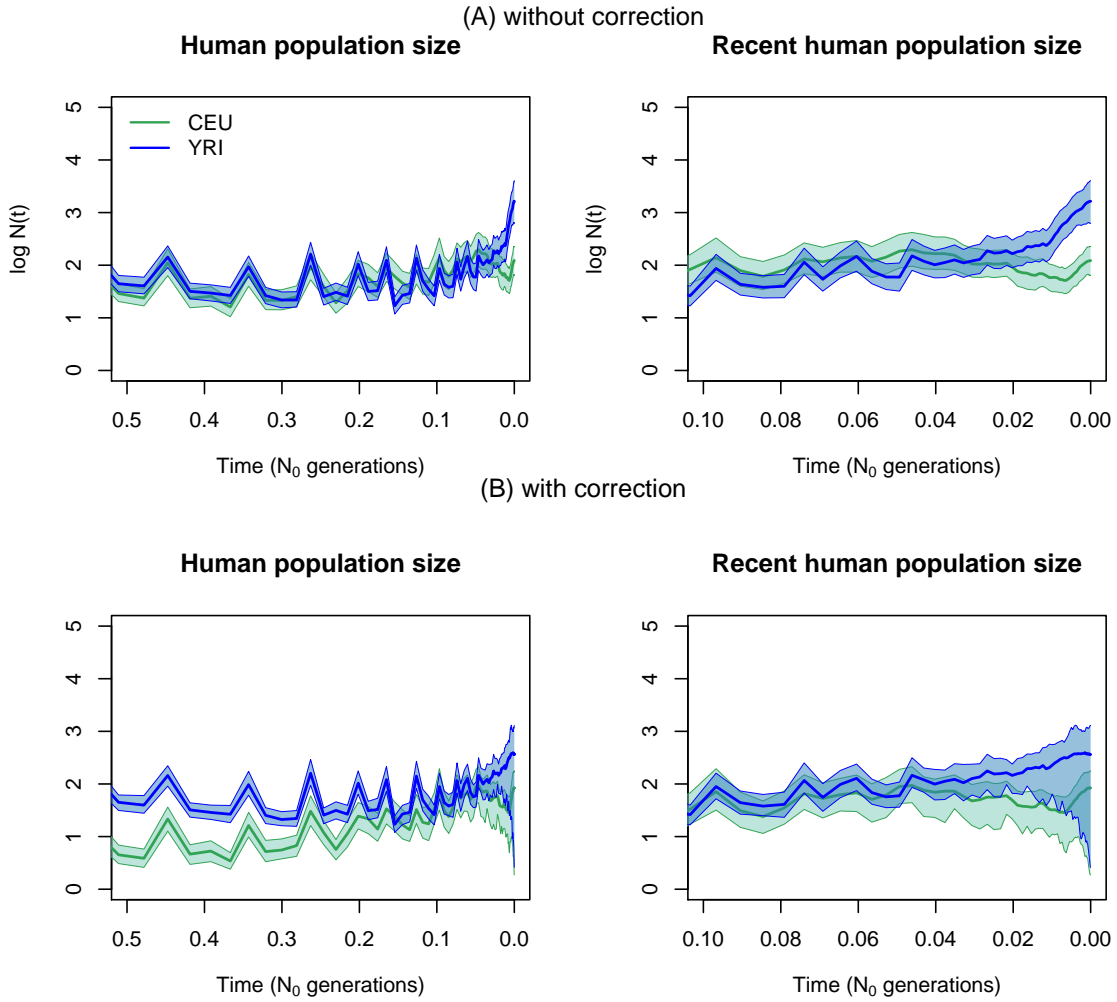

Figure S4: **Inference of human population size trajectories  $N(t)$  for  $n = 10$ .** Green solid line and green shaded areas represent the posterior median and 95% BCI for European population (CEU) and blue solid line and blue shaded areas represent the posterior median and 95% BCI for Yoruban population. **(A) Without correction.** We ignore the fact that our genealogies were generated assuming the SMC process instead of SMC'. **(B) With correction.** We corrected the function of the number of lineages to approximate the SMC likelihood. Figures on the right show the same results as in the left side for the recent past  $(0, 0.1N_0)$ .
