# Supplementary material for: Bayesian Nonparametric Inference of Population Size Changes from Sequential Genealogies
Source: Oxford University Press journal article supplement (doi:10.1534/genetics.115.177980), 2015-07-28
Supplement: genetics.115.177980-8.pdf [file genetics.115.177980-8.pdf]

# Supporting Information

## File S1. Visible Transitions

Figure SA shows an example of a visible transition when the coalescent topology remains the same and Figure SB shows an example of a visible transition when the coalescent topology changes (coalescence between the (a,(b,c)) branch and the (d,e) branch happens after coalescence of (f) and (g) on the left tree and before coalescence of (f) and (g) on the right tree.) Green lines mark the possible pruning locations that could have led to the same visible transition; the red circle indicates the deleted node at coalescent time  $t_{del}$  and the blue circle indicates the new node created at coalescent time  $t_{new}$ .

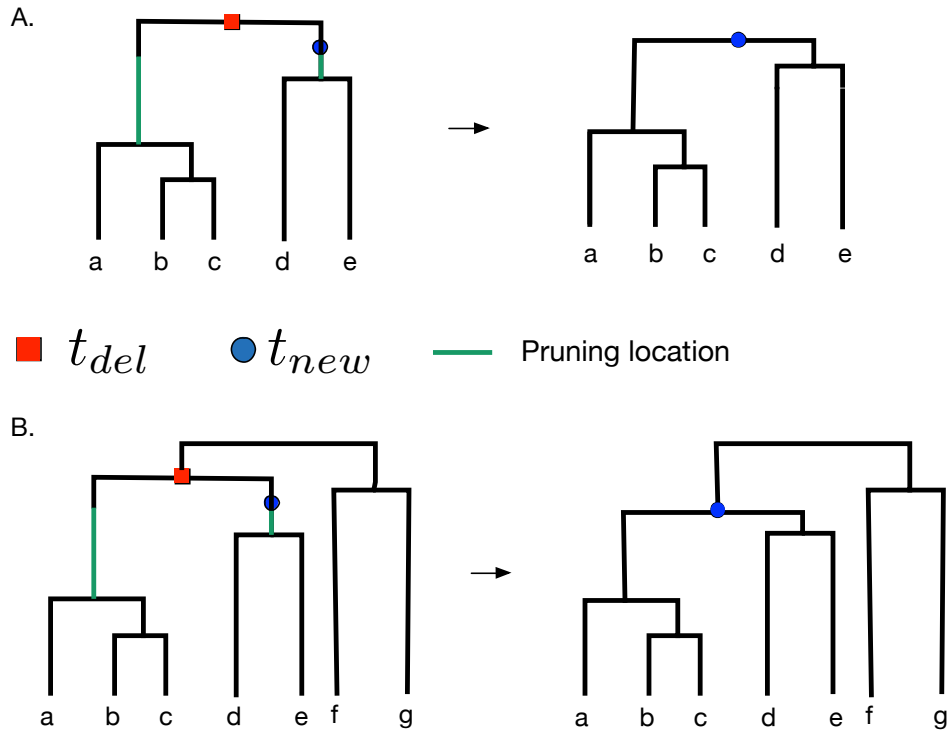

Figure S1: Examples of visible transitions when the pruning branch is uncertain. Red circle indicates deleted node at coalescent time  $t_{del}$ , blue circle indicates new node at coalescent time  $t_{new}$ . Green lines indicates possible pruning locations that could have resulted in such a visible transition. A. The topology remains the same. B. The topology changes.
